# Supplementary material
Source: PubMed Central journal article supplement (PMC6818165)
Supplement: mmc1.pdf [file mmc1.pdf]

**Biophysical Journal, Volume 117**

**Supplemental Information**

**Importance of Erythrocyte Deformability for the Alignment of Malaria  
Parasite upon Invasion**

**Sebastian Hillringhaus, Anil K. Dasanna, Gerhard Gompper, and Dmitry A. Fedosov**

## SUPPLEMENTARY FIGURES

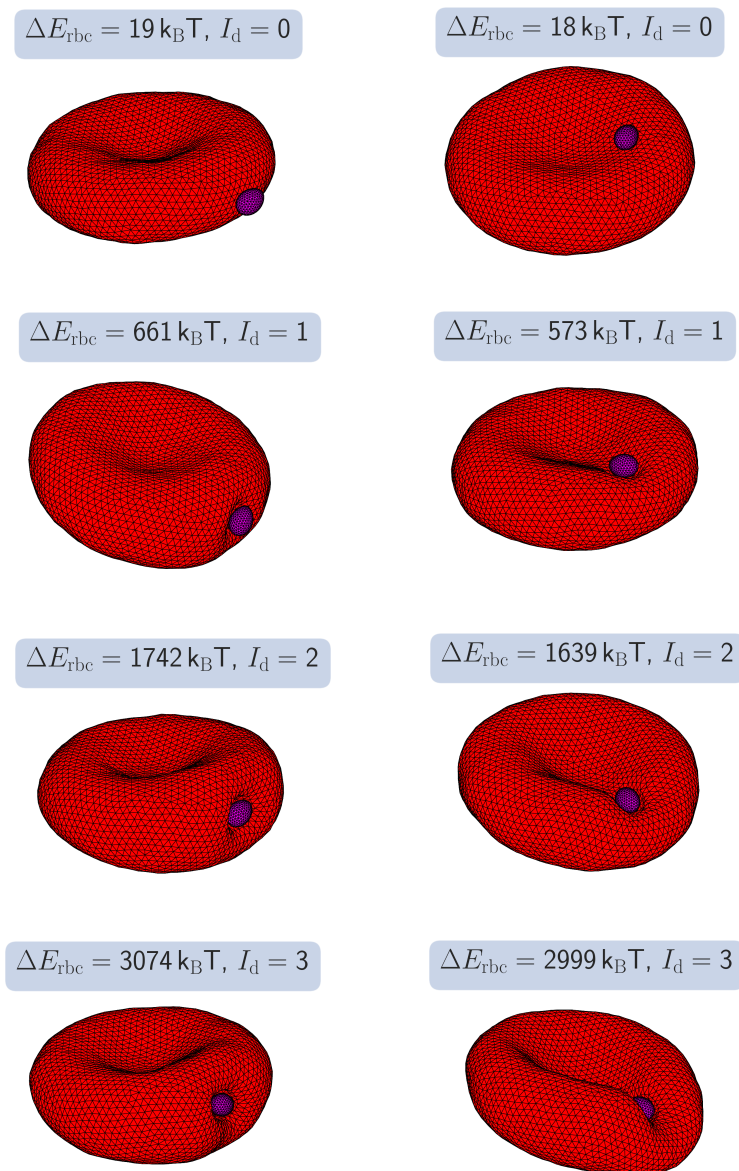

**Figure S1.** Snapshots of deformed RBCs due to parasite adhesion, including side (left column) and top (right column) contacts. Interaction strengths from top to bottom are  $\epsilon_a/k_B T = 1, 4, 7, 10$  for both adhesion contacts. Depending on the interaction strength the parasite induces membrane deformations of various intensity. These deformations are classified visually by a deformation index  $I_d$  (see Table 2 in the main text) and quantified by the deformation energy  $\Delta E_{\text{rbc}}$  shown in Fig. S2. The snapshots are for the small parasite with  $a = 0$  (homogeneous adhesion).

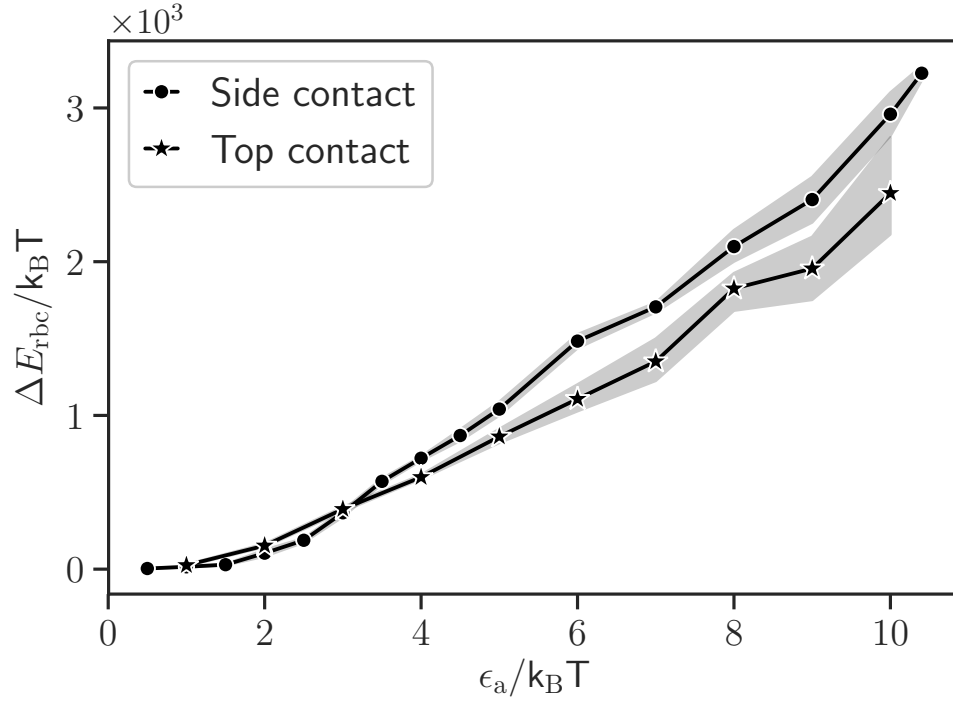

**Figure S2.** Deformation energy  $\Delta E_{\text{rbc}}$  as a function of the interaction strength  $\epsilon_a$  for the small parasite, side (circles) and top (stars) contacts, and  $a = 0$ . The data for both side and top contacts are similar with a difference up to 20 %, which is consistent with the visual observations of RBC deformation in Fig. S1.

## SUPPLEMENTARY MOVIES

- 1) **Movie S1:** Side by side comparison of the adhesion of the small ( $\epsilon_a/k_B T = 4$ ) and large ( $\epsilon_a/k_B T = 2$ ) parasites to RBC membrane with a side contact corresponding to a deformation index  $I_d = 1$  (see snapshots in Fig. 2). Here,  $a = 0$  (homogeneous adhesion).
- 2) **Movie S2:** Side by side comparison of the adhesion of the small ( $\epsilon_a/k_B T = 10$ ) and large ( $\epsilon_a/k_B T = 5.4$ ) parasites to RBC membrane with a side contact corresponding to a deformation index  $I_d = 3$  (see snapshots in Fig. 2). Here,  $a = 0$  (homogeneous adhesion).
- 3) **Movie S3:** An example of parasite detachment simulation, in order to measure the detachment force  $F_{ad}$  (see Fig. 5 A). Here, the small parasite with  $a = 0$  and  $\epsilon_a/k_B T = 10$  is employed.
- 4) **Movie S4:** Alignment of the small parasite at a flexible membrane for  $a = 0$  and  $\epsilon_a/k_B T = 5$  (see Fig. 11 A).
- 5) **Movie S5:** Alignment of the small parasite at a rigid membrane for  $a = 0$  and  $\epsilon_a/k_B T = 5$  (see Fig. 11 C).
